# Supplementary material
Source: publisher figshare collection journal article supplement (https://karger.figshare.com/ndownloader/files/35067742)
Supplement: Supplementary file 1 [file 35067742]

**Online Supplement Table 2**

| **Table 2:** Descriptive data of child behavioral problems and parenting stress for the subsample CG. | | | | | | | | | | |
| --- | --- | --- | --- | --- | --- | --- | --- | --- | --- | --- |
|  | ***M*** | ***SD*** | **HBS total** | **QCFS**  **T1** | **QCFS**  **T2** | **CBCL**  **T3** | **CBCL**  **T4** | **PSI**  **T1** | **PSI**  **T2** | **PSI**  **T3** |
| **HBS total** | 49.53 | 15.09 |  |  |  |  |  |  |  |  |
| **QCFS T1** | 1.34 | 0.26 | .12 |  |  |  |  |  |  |  |
| **QCFS T2** | 1.50 | 0.36 | *.17* | ***.29*** |  |  |  |  |  |  |
| **CBCL T3** | 0.46 | 0.20 | **.24** | .11 | ***.29*** |  |  |  |  |  |
| **CBCL T4** | 0.46 | 0.26 | ***.39*** | **.26** | ***.32*** | ***.55*** |  |  |  |  |
| **PSI T1** | 1.81 | 0.49 | .06 | ***.34*** | **.24** | ***.29*** | ***.27*** |  |  |  |
| **PSI T2** | 1.93 | 0.49 | .12 | ***.32*** | ***.39*** | ***.32*** | ***.32*** | ***.59*** |  |  |
| **PSI T3** | 2.04 | 0.55 | .12 | **.23** | ***.40*** | ***.38*** | ***.37*** | ***.40*** | ***.57*** |  |
| **PSI T4** | 2.12 | 0.53 | **.26** | ***.29*** | ***.35*** | ***.49*** | ***.62*** | ***.32*** | ***.45*** | ***.59*** |
| *Note. HBS: “Heidelberger Belastungsskala”; QCFS: Questionnaire for Crying, Feeding and Sleeping; CBCL: Child Behavior Checklist; PSI: Parenting Stress Index; CG: Control Group (N = 302, nCG = 152); T1-4: child age 4 months, 6 months, 12 months, 24 months; cursive*= p<.05, two-tailed. **bold**=p<.01, two-tailed. ***bold & cursive***=p<.001, two-tailed. | | | | | | | | | | |
